# Supplementary material for: Enlarging the Scope of 5-Aminolevulinic Acid-Mediated Photodiagnosis towards Breast Cancers
Source: MDPI journal article supplement (doi:10.3390/ijms232314900), 2022-11-28
Supplement: s1 [file s1]

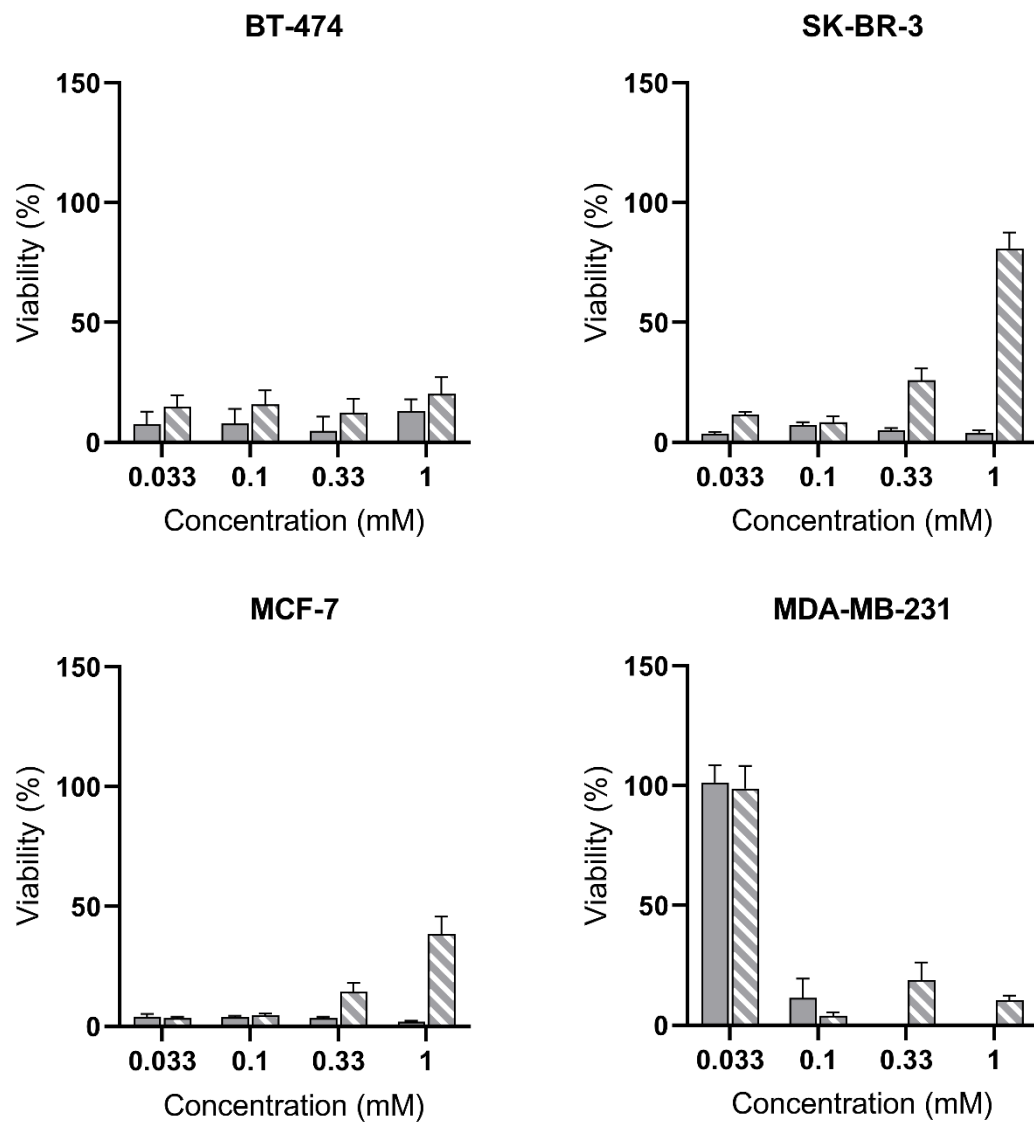

**Figure S1.** Evaluation of the photodynamic therapy potential of ALA-Hex (■) and PSI-ALA-Hex (▨) at concentrations of 0.033, 0.1, 0.33 and 1 mM in BT-474, SK-BR-3, MCF-7 and MDA-MB-231 breast cancer cells in vitro. Cells were incubated for 6 h then exposed to blue light (10 J/cm<sup>2</sup>) and PDT efficacy assessed 24 h post-irradiation by WST-1 viability measurement. Values are normalized against the untreated control exposed to the same blue light fluence.

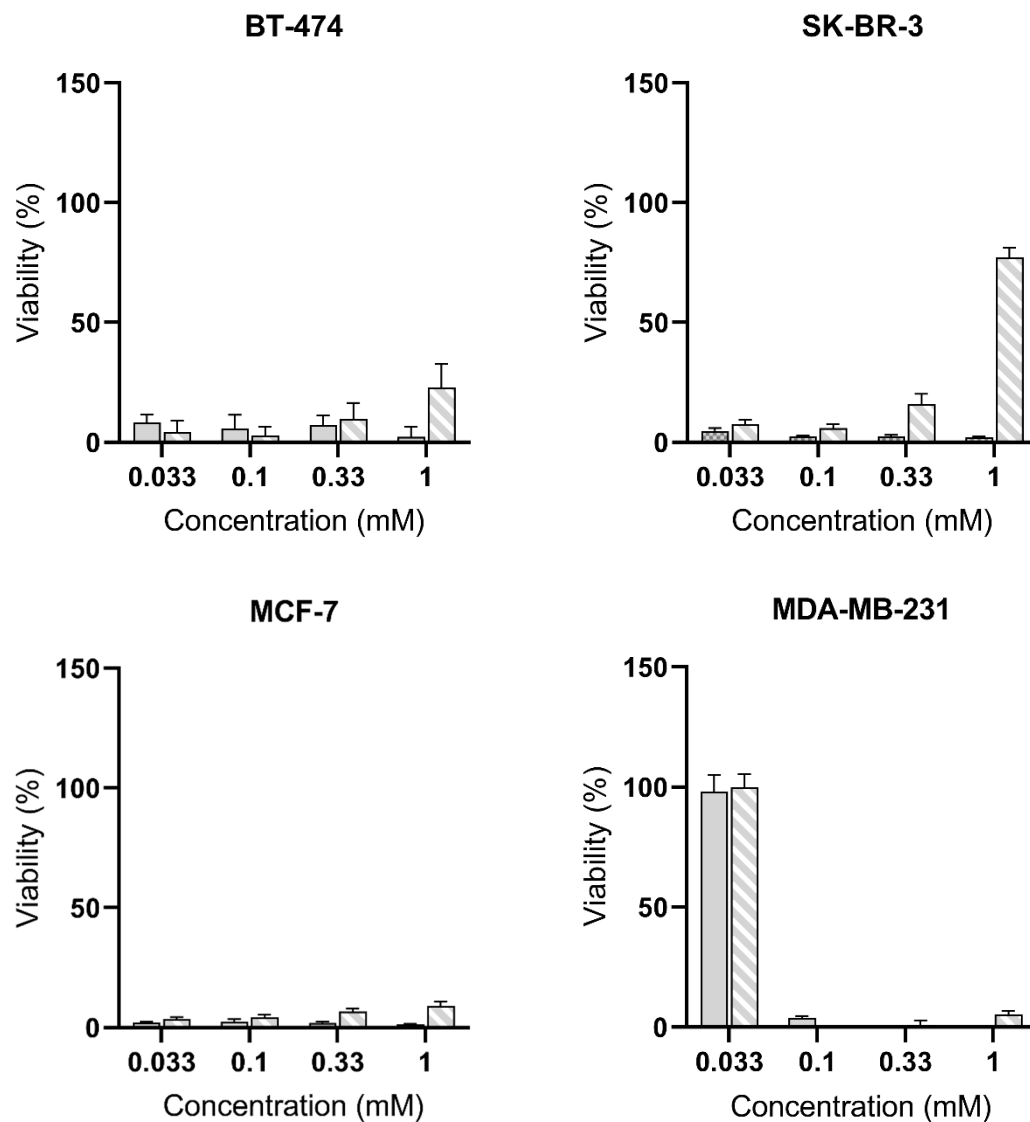

**Figure S2.** Evaluation of the photodynamic therapy potential of ALA-Hex (■) and PSI-ALA-Hex (▨) at concentrations of 0.033, 0.1, 0.33 and 1 mM in BT-474, SK-BR-3, MCF-7 and MDA-MB-231 breast cancer cells in vitro. Cells were incubated for 6 h then exposed to blue light (20 J/cm<sup>2</sup>) and PDT efficacy assessed 24 h post-irradiation by WST-1 viability measurement. Values are normalized against the untreated control exposed to the same blue light fluence.
